# Supplementary material for: The cubic structure of Li3As stabilized by substitution – Li8TtAs4 (Tt = Si, Ge) and Li14TtAs6 (Tt = Si, Ge, Sn) and their lithium ion conductivity
Source: Royal Society of Chemistry journal article supplement (doi:10.1039/d4dt00664j), 2024-01-01
Supplement: d4dt00664j1.pdf [file d4dt00664j1.pdf]

# The cubic structure of $\text{Li}_3\text{As}$ stabilized by substitution – $\text{Li}_8\text{TtAs}_4$ (Tt = Si, Ge) and $\text{Li}_{14}\text{TtAs}_6$ (Tt = Si, Ge, Sn) and their lithium ion conductivity

Martin Schmid<sup>[a]</sup>, Florian Wegner<sup>[a]</sup>, Claudia De Giorgi<sup>[a]</sup>, Florian Pielnhofer<sup>[a]</sup> and Arno Pfitzner<sup>\*[a]</sup>

## Supporting information

### Table of Content

|                                                           |    |
|-----------------------------------------------------------|----|
| 1.Synthesis .....                                         | 2  |
| 2.Crystallographic data and interatomic distances .....   | 4  |
| 2.1 Structure .....                                       | 4  |
| 2.2 Refinement parameters .....                           | 5  |
| 2.3 Atomic positions and displacement parameters .....    | 6  |
| 2.4 Coordination polyhedra .....                          | 7  |
| 2.5 Powder diffraction data and Rietveld refinement ..... | 10 |
| 3.Thermal analysis .....                                  | 12 |
| 3.1 High temperature powder diffraction data .....        | 12 |
| 3.2 Differential thermal analysis (DTA) .....             | 15 |
| 4.Conductivity experiments .....                          | 18 |

## 1.Synthesis

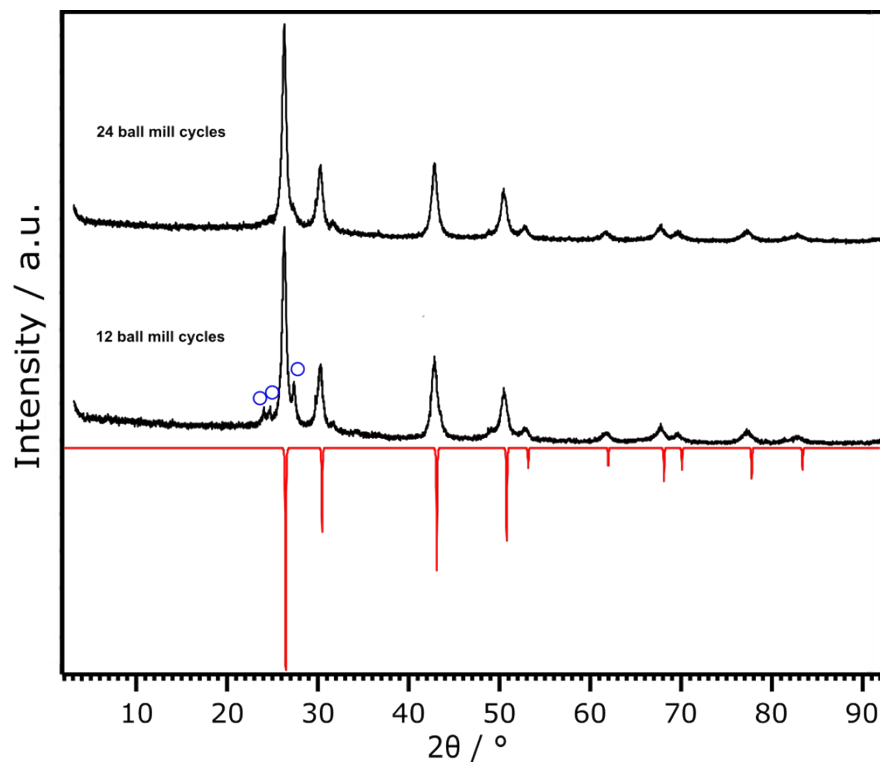

**Figure S1.** Powder diffraction data after ball mill experiment of  $\text{Li}_{14}\text{SiAs}_6$  (black) and calculated intensities (red). Intensities marked with blue circles can be assigned to  $\text{Li}_3\text{As}$ .

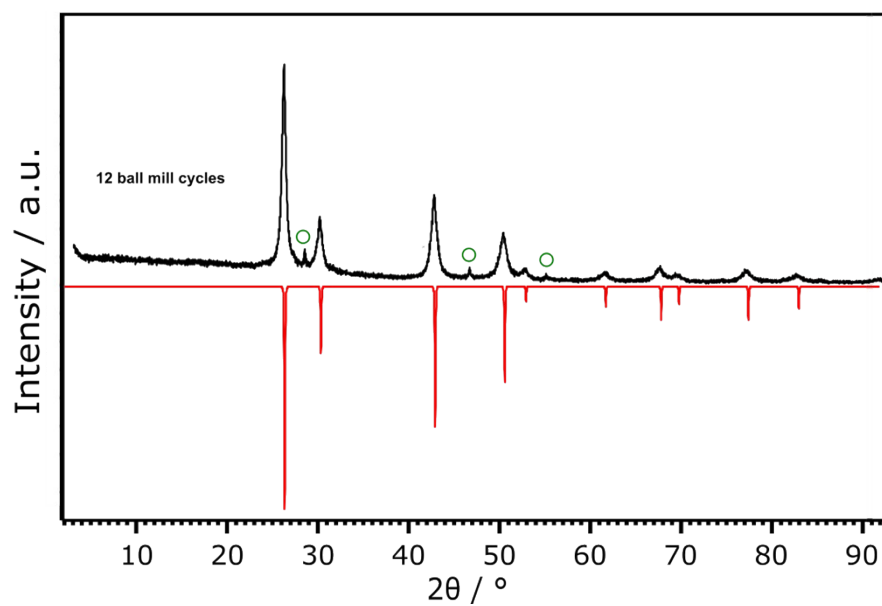

**Figure S2.** Powder diffraction data after ball mill experiment of  $\text{Li}_{14}\text{GeAs}_6$  (black) and calculated intensities (red). Intensities marked with green circles can be assigned to unreacted Ge.

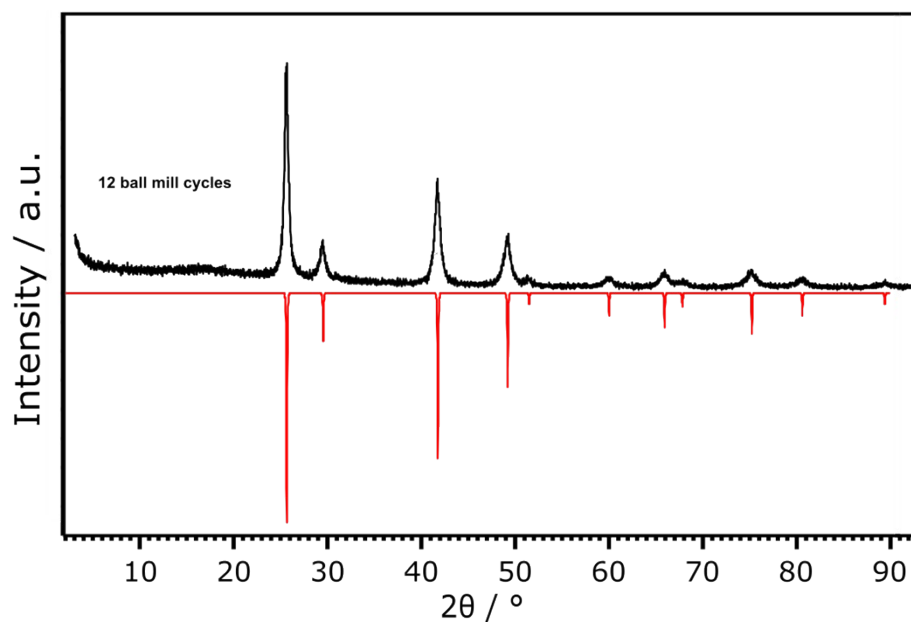

**Figure S3.** Powder diffraction data after ball mill experiment of  $\text{Li}_{14}\text{SnAs}_6$  (black) and calculated intensities (red).

## 2. Crystallographic data and interatomic distances

### 2.1 Structure

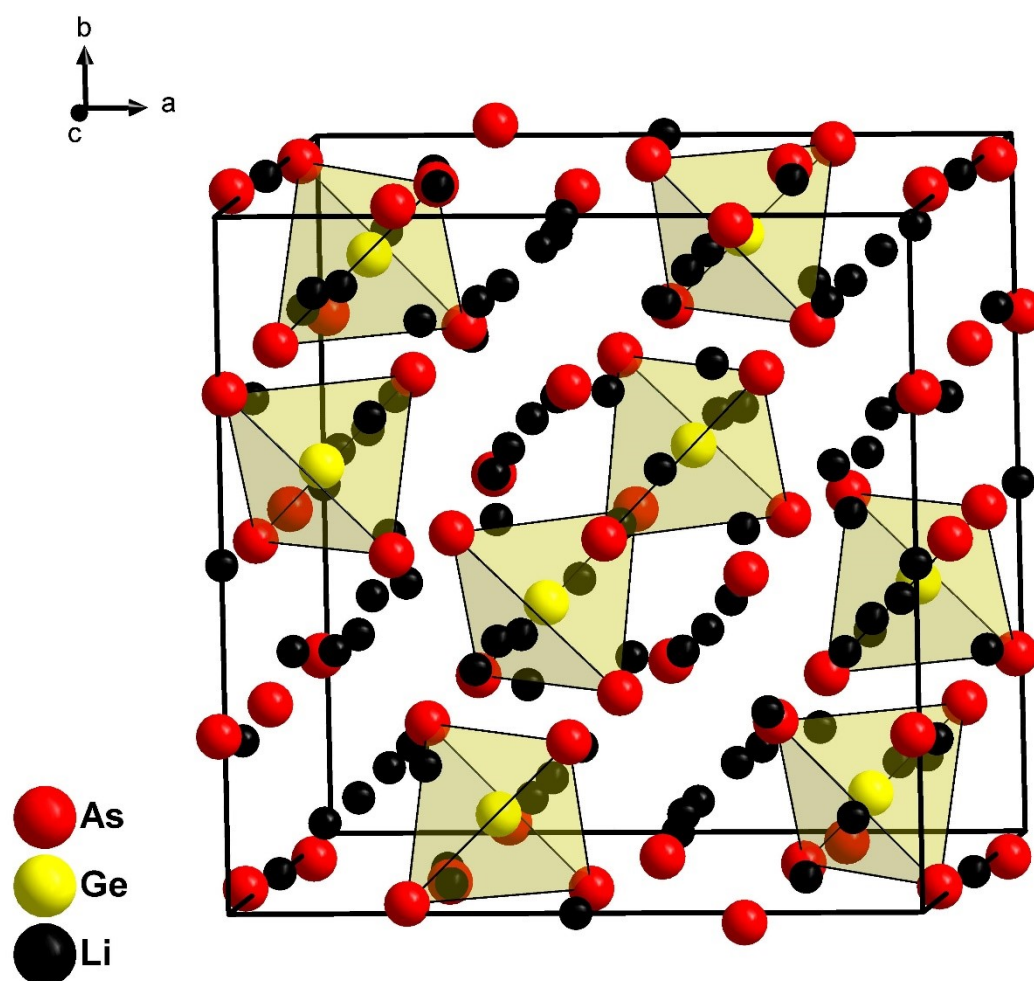

**Figure S4.** Cubic crystal structure of  $\text{Li}_6\text{GeAs}_4$  with  $[\text{GeAs}_4]^{8-}$ -tetrahedra painted in yellow.

## 2.2 Refinement parameters

**Table S1** Refinement parameters of  $\text{Li}_8\text{SiAs}_4$ ,  $\text{Li}_8\text{GeAs}_4$ ,  $\text{Li}_{14}\text{SiAs}_6$ ,  $\text{Li}_{14}\text{GeAs}_6$ ,  $\text{Li}_{14}\text{SnAs}_6$  from Rietveld refinement at room temperature.

| Empirical formula                          | Li <sub>9.333</sub> Si <sub>0.667</sub> As <sub>4</sub> | Li <sub>9.333</sub> Ge <sub>0.667</sub> As <sub>4</sub> | Li <sub>9.333</sub> Sn <sub>0.667</sub> As <sub>4</sub> | Li <sub>8</sub> SiAs <sub>4</sub> | Li <sub>8</sub> GeAs <sub>4</sub> |
|--------------------------------------------|---------------------------------------------------------|---------------------------------------------------------|---------------------------------------------------------|-----------------------------------|-----------------------------------|
| T / K                                      | 293                                                     |                                                         |                                                         |                                   |                                   |
| Rad. wavelength                            | λ = 1.5406 Å                                            |                                                         |                                                         |                                   |                                   |
| Θ range / deg.                             | 2.00 – 90.545                                           |                                                         |                                                         | 2.00 – 91.985                     |                                   |
| Crystal system                             | cubic                                                   |                                                         |                                                         |                                   |                                   |
| Space group                                | <i>Fm</i> $\bar{3}$ <i>m</i> (No. 225)                  |                                                         |                                                         | <i>Pa</i> $\bar{3}$ (No. 218)     |                                   |
| Color                                      | dark red                                                | grey                                                    | grey                                                    | dark red                          | grey                              |
| <i>a</i> / Å                               | 6.131(1)                                                | 6.143(1)                                                | 6.193(1)                                                | 12.096(1)                         | 12.170(1)                         |
| <i>V</i> / Å <sup>3</sup>                  | 230.4(2)                                                | 231.8(1)                                                | 237.53(1)                                               | 1769.8(1)                         | 1802.7(1)                         |
| <i>Z</i>                                   | 1                                                       | 1                                                       | 1                                                       | 8                                 | 8                                 |
| Formula weight / g mol <sup>-1</sup>       | 383.2                                                   | 412.8                                                   | 443.6                                                   | 383.3                             | 427.8                             |
| ρ calc.) / g cm <sup>-3</sup>              | 2.761                                                   | 2.956                                                   | 3.101                                                   | 2.876                             | 3.152                             |
| <i>R</i> <sub>p</sub>                      | 0.0483                                                  | 0.0637                                                  | 0.0445                                                  | 0.0439                            | 0.0608                            |
| <i>R</i> <sub>wp</sub>                     | 0.0603                                                  | 0.0841                                                  | 0.0580                                                  | 0.0562                            | 0.0877                            |
| <i>R</i> <sub>exp</sub>                    | 0.0364                                                  | 0.0561                                                  | 0.0409                                                  | 0.0516                            | 0.0820                            |
| <i>R</i> <sub>gt</sub>                     | 0.0124,                                                 | 0.0265,                                                 | 0.0137,                                                 | 0.0169,                           | 0.0165,                           |
| <i>wR</i> <sub>gt</sub> ( <i>I</i> > 3σ)   | 0.0166                                                  | 0.0328                                                  | 0.0174                                                  | 0.0222                            | 0.0205                            |
| <i>R</i> <sub>all</sub>                    | 0.0124,                                                 | 0.0265,                                                 | 0.0137,                                                 | 0.0229,                           | 0.0269,                           |
| <i>wR</i> <sub>all</sub>                   | 0.0166                                                  | 0.0328                                                  | 0.0174                                                  | 0.0236                            | 0.0224                            |
| Δρ <sub>min</sub> , Δρ <sub>max</sub> / eV | -0.16, 0.11                                             | -0.22, 0.30                                             | -0.10, 0.23                                             | -0.31, 0.24                       | -0.31, 0.31                       |
| GOOF                                       | 1.66                                                    | 1.50                                                    | 1.42                                                    | 1.09                              | 1.07                              |
| Deposition number (CCDC)                   | 2332050                                                 | 2332051                                                 | 2332049                                                 | 2332048                           | 2332047                           |

## 2.3 Atomic positions and displacement parameters

**Table S2** List of the atomic positions and corresponding displacement parameters from the Rietveld refined structures of  $\text{Li}_8\text{SiAs}_4$  and  $\text{Li}_8\text{GeAs}_4$ .

| $\text{Li}_8\text{SiAs}_4$ | Wyck. position | x           | y           | z         | $U_{\text{iso}} / \text{\AA}^2$ | Occupancy / % |
|----------------------------|----------------|-------------|-------------|-----------|---------------------------------|---------------|
| As1                        | 24d            | 0.25969(7)  | 0.01653(7)  | 0.9912(3) | 0.0208(4)                       | 100           |
| As2                        | 8c             | 0.25849(3)  | 0.2585(3)   | 0.2585(3) | 0.0215(12)                      | 100           |
| Si1                        | 8c             | 0.6283(6)   | 0.6283(6)   | 0.6283(6) | 0.0151(16)                      | 100           |
| Li1                        | 4b             | 1/2         | 1/2         | 1/2       | 0.030(4)                        | 100           |
| Li2                        | 8c             | 0.113(3)    | 0.130(4)    | 0.868(3)  | 0.030(4)                        | 100           |
| Li3                        | 24d            | 0.130(4)    | 0.130(4)    | 0.130(4)  | 0.030(4)                        | 100           |
| Li4                        | 24d            | 0.139(4)    | 0.131(3)    | 0.370(3)  | 0.030(4)                        | 100           |
| Li5                        | 24d            | 0.00(3)     | 0.26(3)     | 0.759(5)  | 0.030(4)                        | 16.67         |
| $\text{Li}_8\text{GeAs}_4$ |                | x           | y           | z         | $U_{\text{iso}} / \text{\AA}^2$ | Occupancy / % |
| As1                        | 24d            | 0.25613(12) | 0.01329(11) | 0.9930(3) | 0.0115(7)                       | 100           |
| As2                        | 8c             | 0.2553(3)   | 0.2553(3)   | 0.2553(3) | 0.020(2)                        | 100           |
| Ge1                        | 8c             | 0.6275(3)   | 0.6275(3)   | 0.6275(3) | 0.0112(9)                       | 100           |
| Li1                        | 4b             | 1/2         | 1/2         | 1/2       | 0.036(6)                        | 100           |
| Li2                        | 8c             | 0.123(4)    | 0.116(4)    | 0.878(4)  | 0.036(6)                        | 100           |
| Li3                        | 24d            | 0.141(3)    | 0.141(3)    | 0.141(3)  | 0.036(6)                        | 100           |
| Li4                        | 24d            | 0.142(5)    | 0.137(4)    | 0.375(4)  | 0.036(6)                        | 100           |
| Li5                        | 24d            | 0.982(84)   | 0.215(16)   | 0.710(12) | 0.036(6)                        | 16.67         |

**Table S3** List of the atomic positions and displacement parameters for  $\text{Li}_{14}\text{SiAs}_6$ ,  $\text{Li}_{14}\text{GeAs}_6$ , and  $\text{Li}_{14}\text{SnAs}_6$  from Rietveld refinements.

| $\text{Li}_{14}\text{SiAs}_6$ | Wyck. position | x   | y   | z   | $U_{\text{iso}} / \text{\AA}^2$ | Occupancy / % |
|-------------------------------|----------------|-----|-----|-----|---------------------------------|---------------|
| As1                           | 4a             | 0   | 0   | 0   | 0.03282(14)                     | 100           |
| Si1                           | 8c             | 1/4 | 1/4 | 1/4 | 0.0448(7)                       | 8.33          |
| Li1                           | 8c             | 1/4 | 1/4 | 1/4 | 0.0448(7)                       | 91.67         |
| Li2                           | 4b             | 1/2 | 0   | 0   | 0.101(4)                        | 50            |
| $\text{Li}_{14}\text{GeAs}_6$ |                | x   | y   | z   | $U_{\text{iso}} / \text{\AA}^2$ | Occupancy / % |
| As1                           | 4a             | 0   | 0   | 0   | 0.0396(2)                       | 100           |
| Ge1                           | 8c             | 1/4 | 1/4 | 1/4 | 0.0473(8)                       | 8.33          |
| Li1                           | 8c             | 1/4 | 1/4 | 1/4 | 0.0473(8)                       | 91.67         |
| Li2                           | 4b             | 1/2 | 0   | 0   | 0.192(14)                       | 50            |
| $\text{Li}_{14}\text{SnAs}_6$ |                | x   | y   | z   | $U_{\text{iso}} / \text{\AA}^2$ | Occupancy / % |
| As1                           | 4a             | 0   | 0   | 0   | 0.01797(13)                     | 100           |
| Sn1                           | 8c             | 1/4 | 1/4 | 1/4 | 0.0283(3)                       | 8.33          |
| Li1                           | 8c             | 1/4 | 1/4 | 1/4 | 0.0283(3)                       | 91.67         |
| Li2                           | 4b             | 1/2 | 0   | 0   | 0.198(8)                        | 50            |

## 2.4 Coordination polyhedra

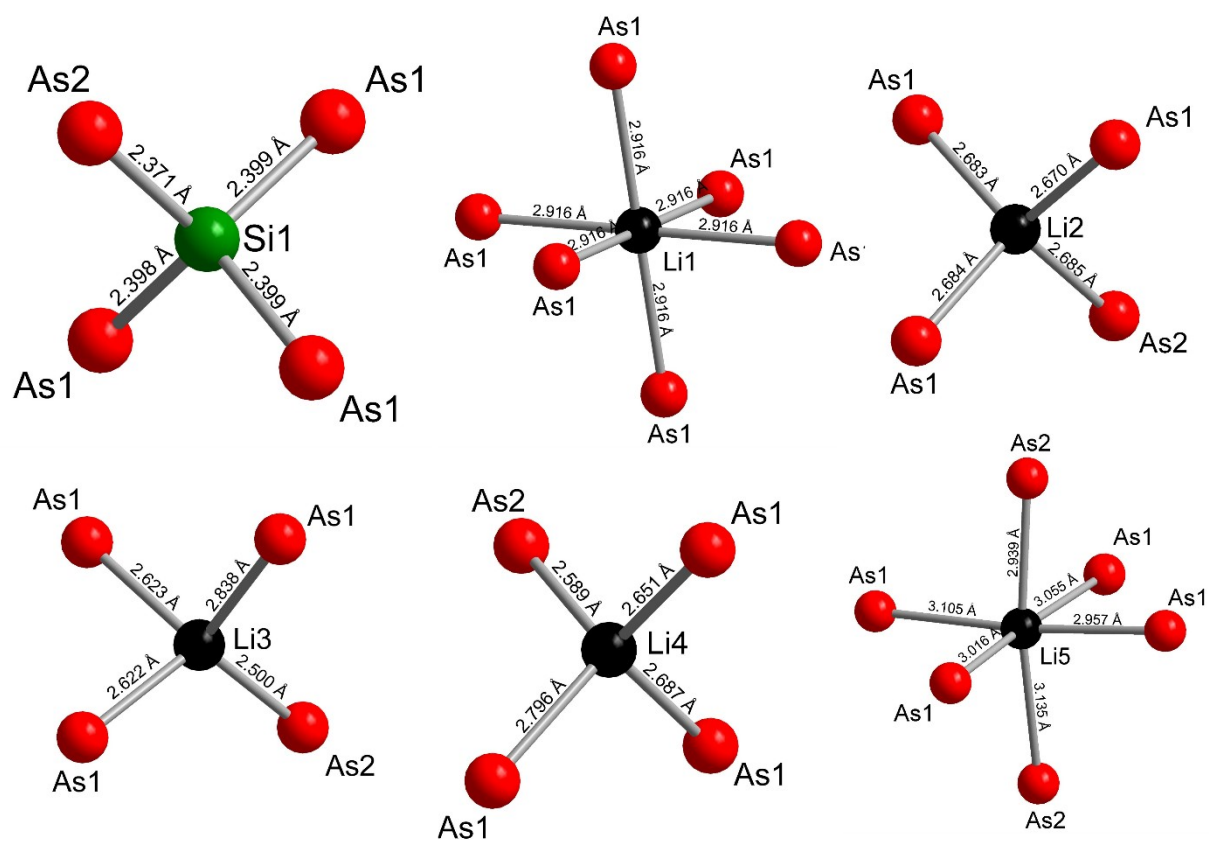

**Figure S5.** Selected coordination polyhedra in  $\text{Li}_8\text{SiAs}_4$ .

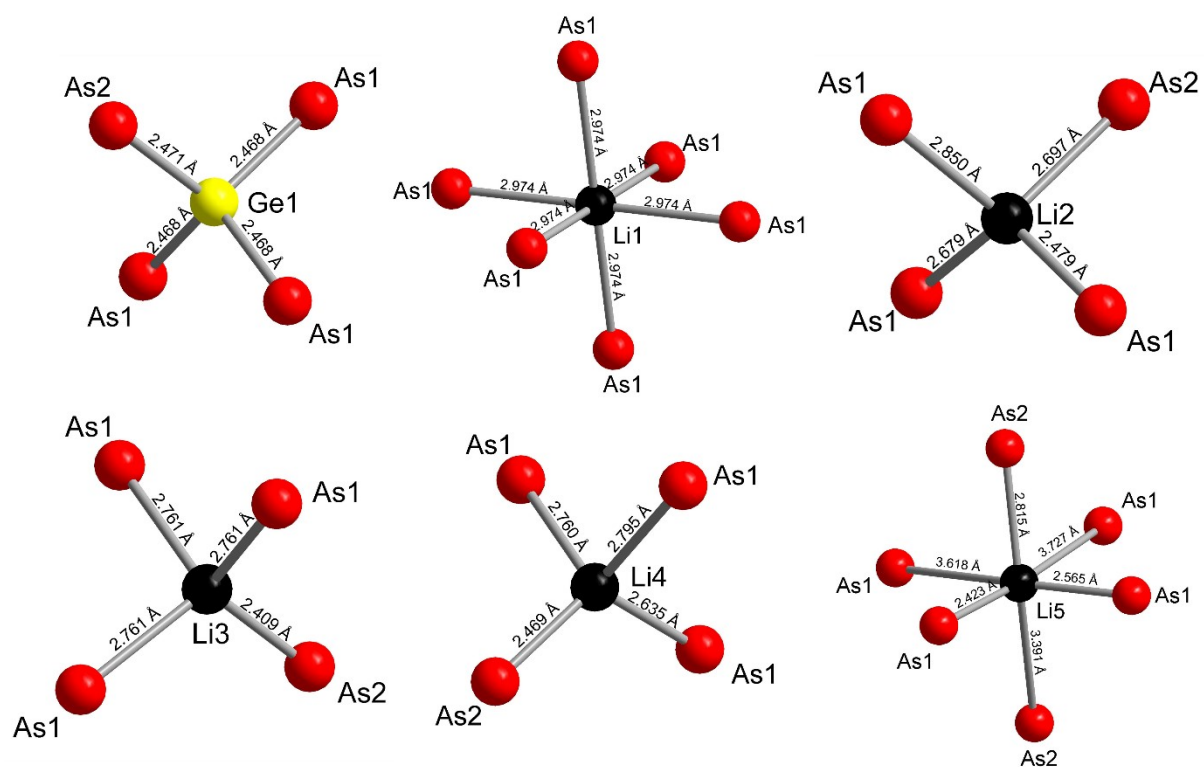

**Figure S6.** Selected coordination polyhedra in  $\text{Li}_8\text{GeAs}_4$ .

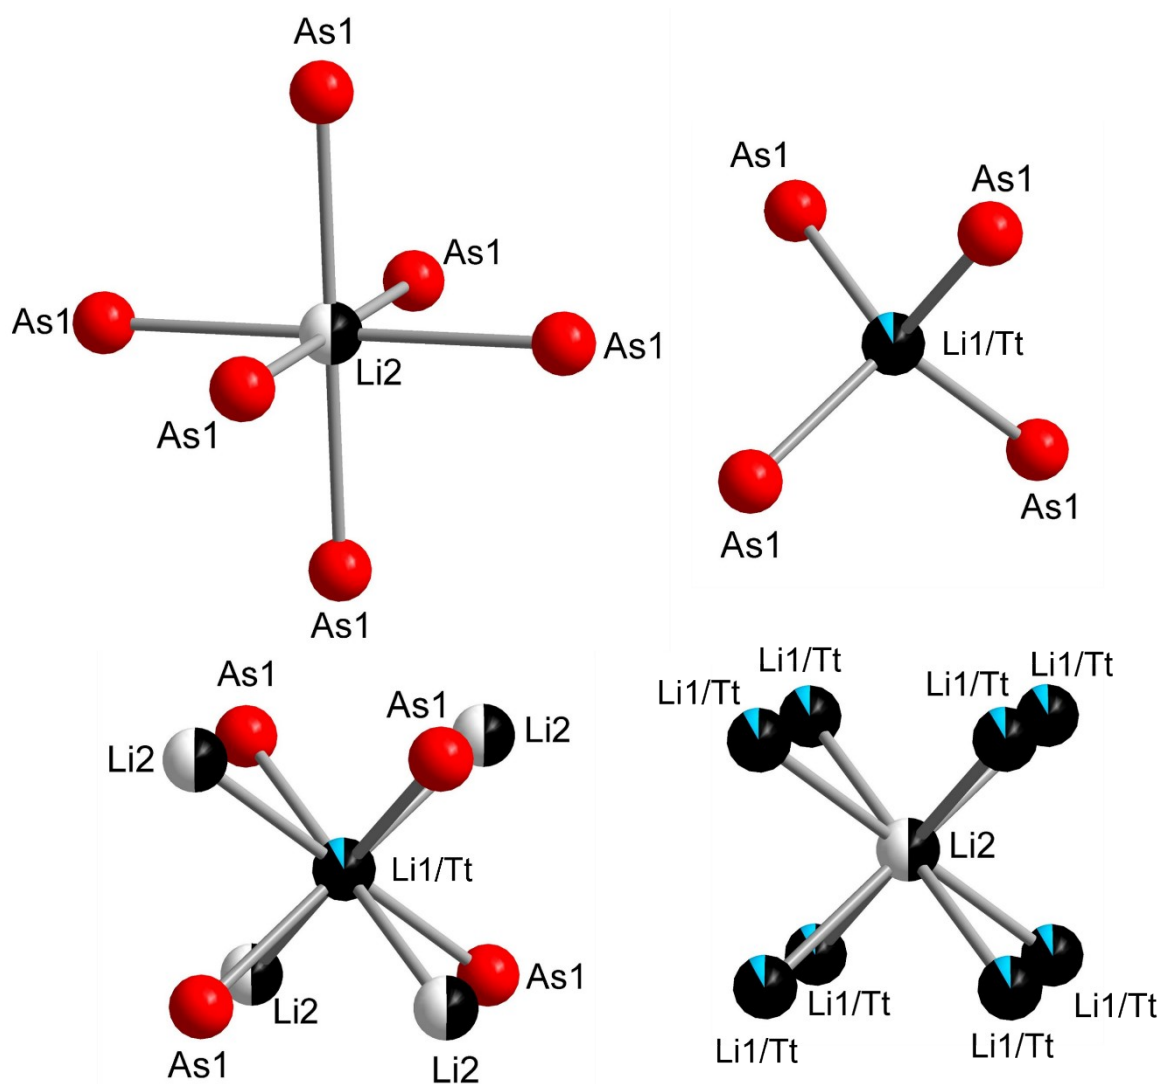

**Figure S7.** Selected coordination polyhedra in  $\text{Li}_{14}\text{TtAs}_6$  ( $\text{Tt} = \text{Si}, \text{Ge}, \text{Sn}$ ). Interatomic distances for each compound are given in Table 1.

## 2.5 Powder diffraction data and Rietveld refinement

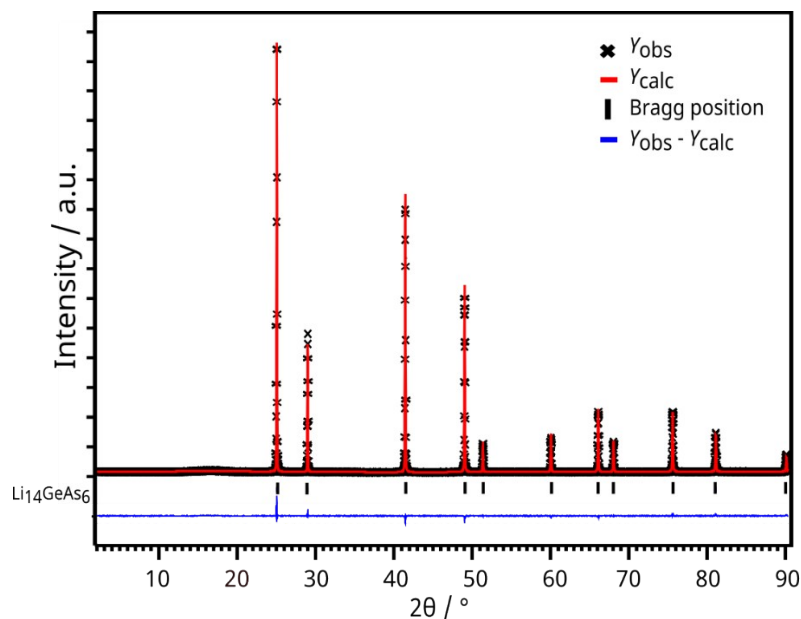

**Figure S8.** X-ray powder diffraction data with Rietveld analysis of  $\text{Li}_{14}\text{GeAs}_6$ . Observed intensities  $Y_{\text{obs}}$  are displayed with black crosses, the red line indicates the calculated intensities  $Y_{\text{calc}}$ , Bragg positions are marked with black lines and the difference plot ( $Y_{\text{obs}} - Y_{\text{calc}}$ ) is drawn in blue.

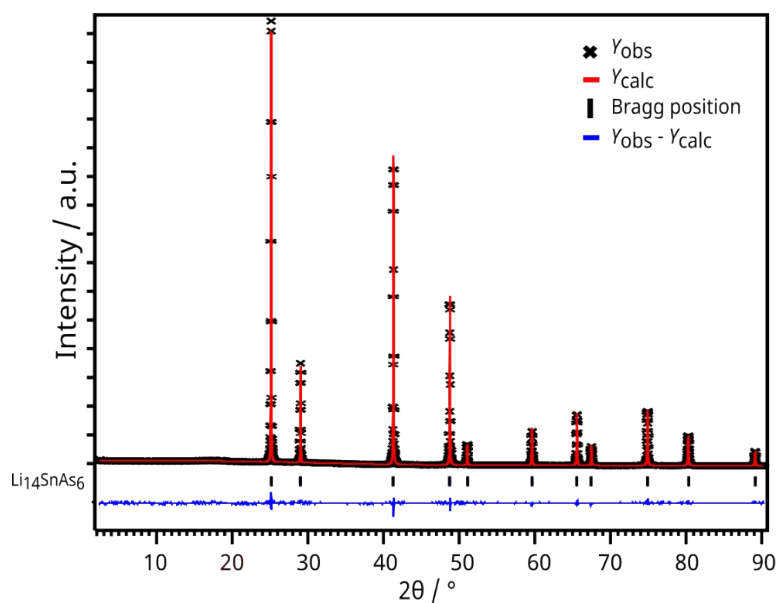

**Figure S9.** X-ray powder diffraction data with Rietveld analyses of  $\text{Li}_{14}\text{SnAs}_6$ . Observed intensities  $Y_{\text{obs}}$  are displayed with black crosses, the red line indicates the calculated intensities  $Y_{\text{calc}}$ , Bragg positions are marked with black lines and the difference plot ( $Y_{\text{obs}} - Y_{\text{calc}}$ ) is drawn in blue.

### Rietveld refinement

The proposed structure solution of  $\text{Li}_{14}\text{TtAs}_6$  ( $\text{Tt} = \text{Si, Ge, Sn}$ ) were achieved using X-Ray powder diffraction data. Since no sufficient amounts of powder were feasible to perform neutron powder diffraction, several limitations occur regarding the structure solution using XRPD-data. The occupancy distribution of the tetrahedral void by lithium and tetrel cation in the ratio of 1:11 was fixed according to the stoichiometric amount of tetrel and lithium weight in, since the electron density of Si and Li is not distinguishable on the same crystallographic position by XRPD. The absence of side phases and lowest residual values for the proposed distribution support this solution. Further the distribution of lithium content on the Li1 position in the tetrahedral voids and the Li2 position in the octahedral voids is indirectly connected with the ratio of lithium and tetrel cation in the tetrahedral voids and therefore was set to a S.O.F of 0.5 in accordance with the principle of electroneutrality and good agreement with residual electron density.

### 3. Thermal analysis

#### 3.1 High temperature powder diffraction data

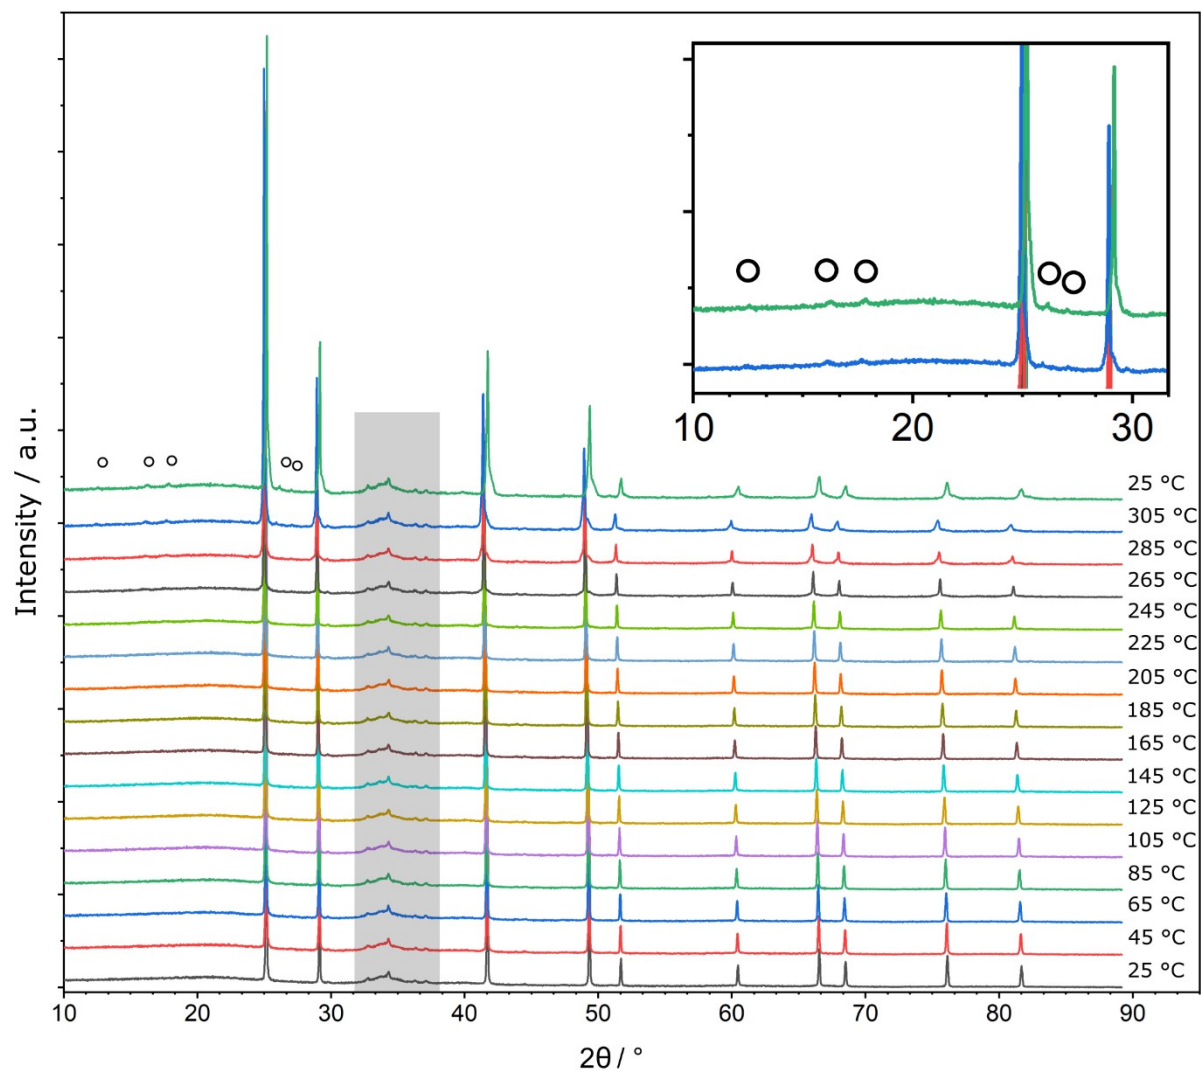

**Figure S10.** High temperature powder diffraction data (25 °C → 305 °C → 25 °C) of  $\text{Li}_{14}\text{SiAs}_6$  in steps of 20 °C. Additional reflexes are emerging at a temperature of 305 °C which can be assigned to  $\text{Li}_3\text{As}$  and  $\text{Li}_8\text{SiAs}_4$  (marked with a circle). Please note that artefacts of the heating device are present in a  $2\theta$  range of 32 ° - 38 ° (grey background).

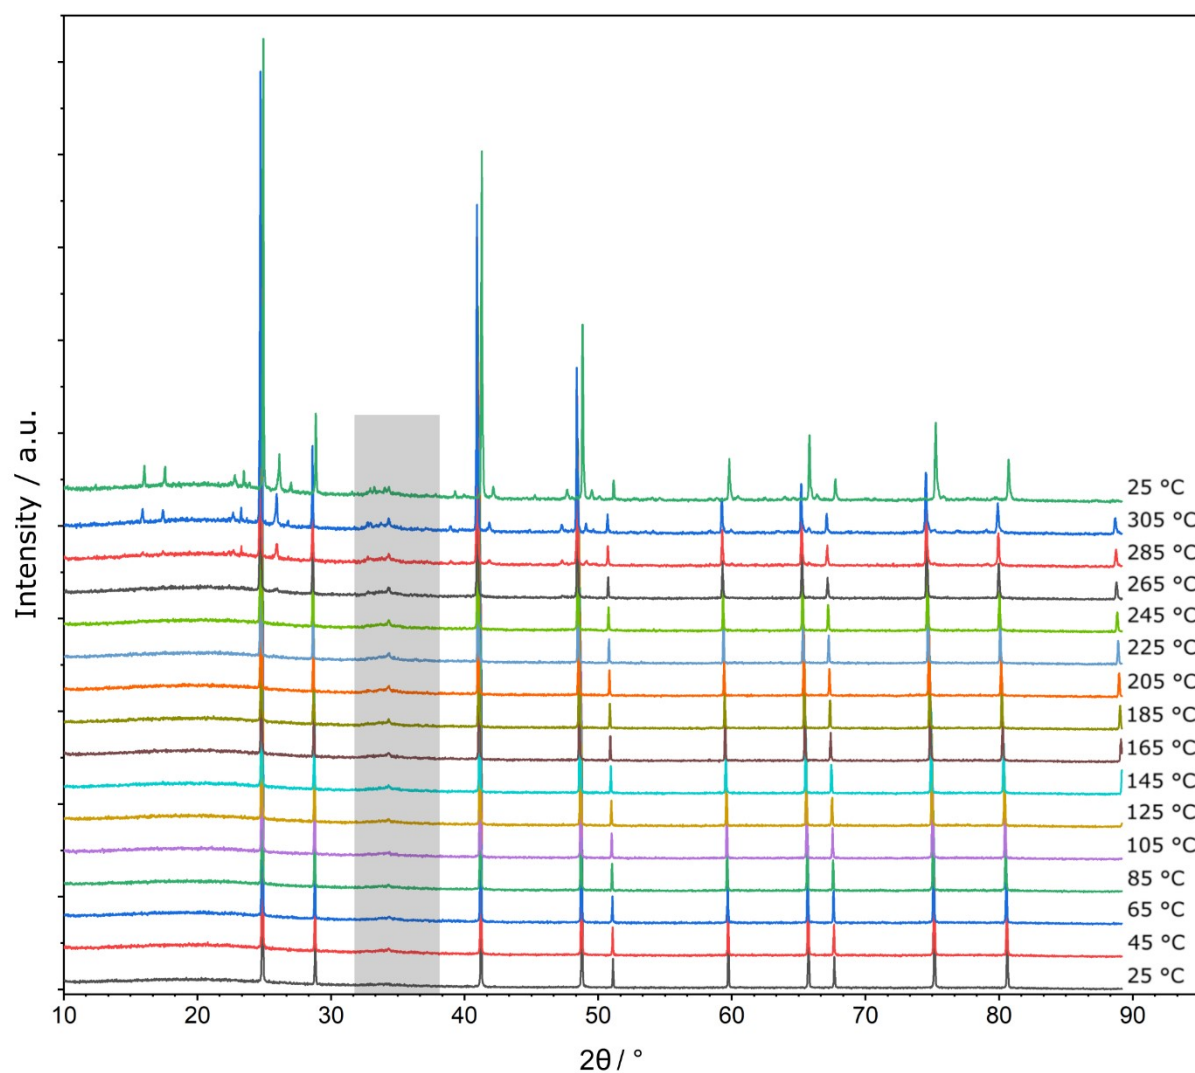

**Figure S11.** High temperature powder diffraction data (25 °C → 305 °C → 25 °C) of  $\text{Li}_{14}\text{SnAs}_6$  in steps of 20 °C. Additional reflections are emerging at a temperature of 285 °C which can be assigned to  $\text{Li}_3\text{As}$  and formal  $\text{Li}_8\text{SnAs}_4$ . Please note that artefacts of the heating device are present in a  $2\theta$  range of 32 ° - 38 ° (grey background).

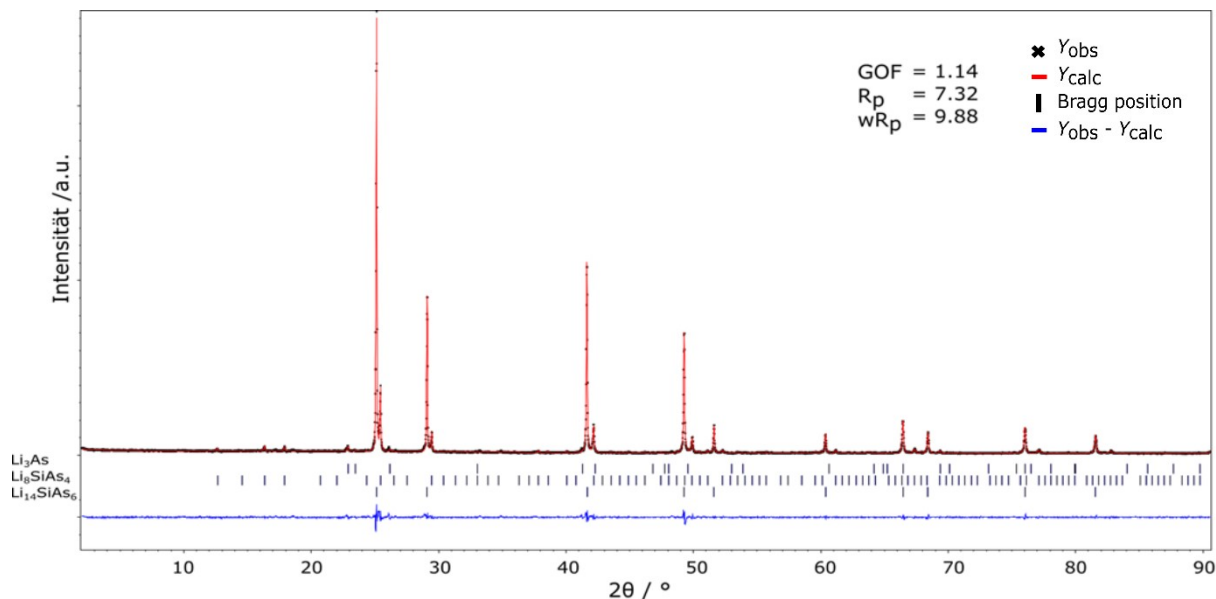

**Figure S12.** Powder X-Ray diffraction data of  $\text{Li}_{14}\text{SiAs}_6$  after DTA with indexed reflections. Observed intensities  $Y_{\text{obs}}$  are displayed with black crosses, the red line indicates the calculated intensities  $Y_{\text{calc}}$ , Bragg positions are marked with black lines and the difference plot ( $Y_{\text{obs}} - Y_{\text{calc}}$ ) is drawn in blue. Due to decomposition processes of  $\text{Li}_{14}\text{SiAs}_4$  (indexed with  $a = 6.126(1) \text{ \AA}$ ) the two phases  $\text{Li}_3\text{As}$  (indexed with  $a = b = 4.362(1) \text{ \AA}$  and  $c = 7.773(1) \text{ \AA}$ ) and  $\text{Li}_8\text{SiAs}_4$  (indexed with  $a = 12.107(1) \text{ \AA}$ ) are present.

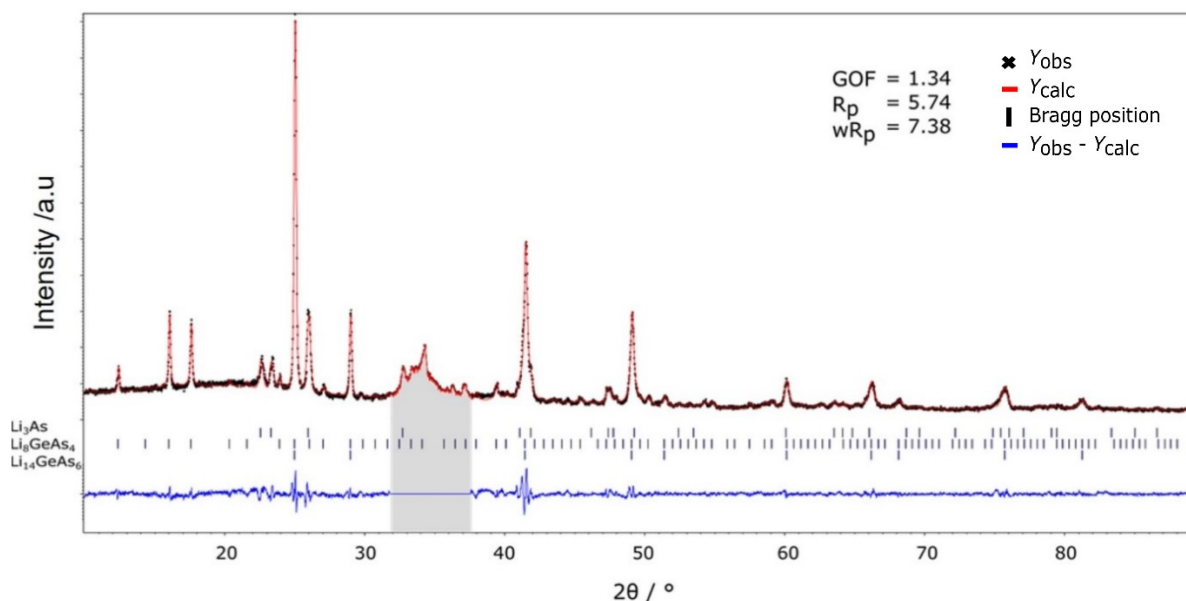

**Figure S13.** Powder X-Ray diffraction data of  $\text{Li}_{14}\text{GeAs}_6$  at  $305^\circ\text{C}$  with indexed reflections. Observed intensities  $Y_{\text{obs}}$  are displayed with black crosses, the red line indicates the calculated intensities  $Y_{\text{calc}}$ , Bragg positions are marked with black lines and the difference plot ( $Y_{\text{obs}} - Y_{\text{calc}}$ ) is drawn in blue. Because of artefacts of the heating device, the  $2\theta$  range from  $32^\circ$  -  $38^\circ$  is excluded from analysis (grey background). Due to decomposition processes of  $\text{Li}_{14}\text{GeAs}_4$  (indexed with  $a = 6.142(1) \text{ \AA}$ ) the two phases  $\text{Li}_3\text{As}$  (indexed with  $a = b = 4.384(1) \text{ \AA}$  and  $c = 7.783(1) \text{ \AA}$ ) and  $\text{Li}_8\text{GeAs}_4$  (indexed with  $a = 12.284(1) \text{ \AA}$ ) are present.

### 3.2 Differential thermal analysis (DTA)

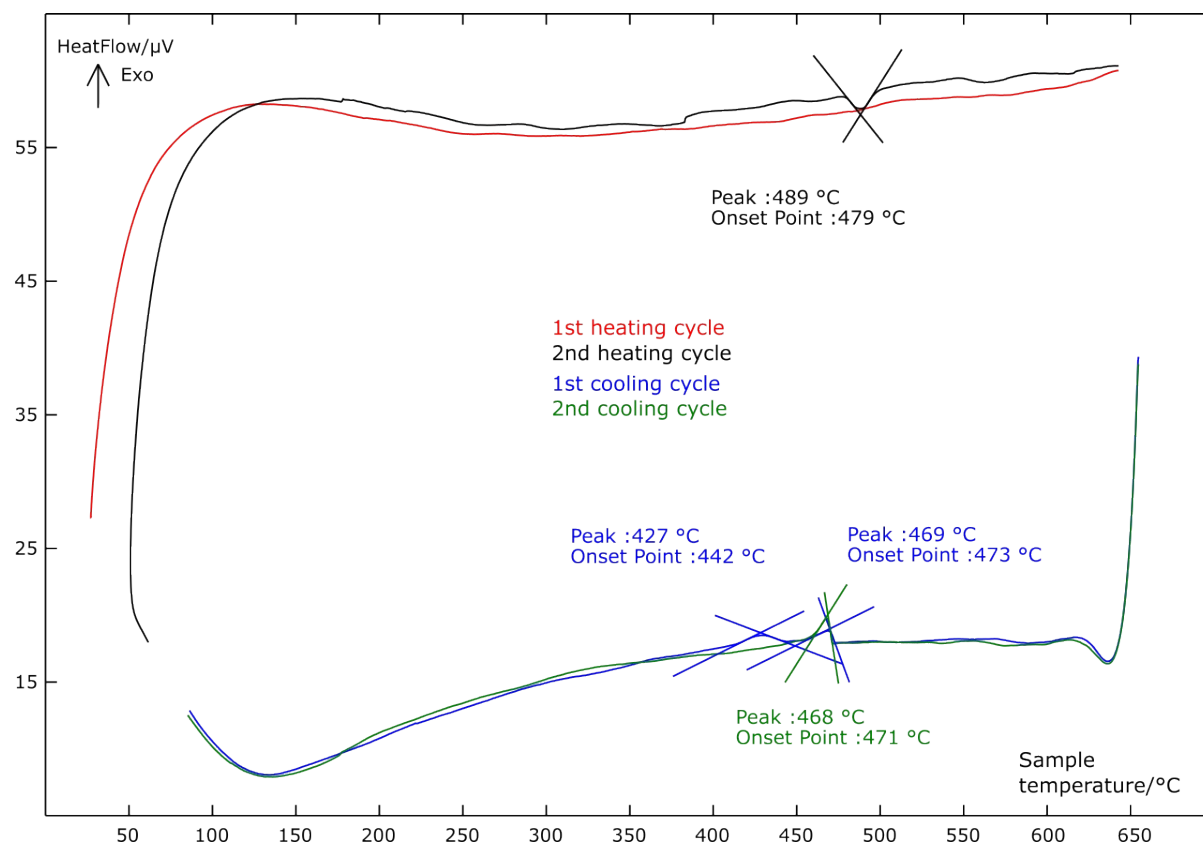

**Figure S14.** Differential thermal analysis (DTA) of  $\text{Li}_{14}\text{SiAs}_6$  showing endothermal effects in the heating cycles (red and black) and exothermal effects in the cooling cycles (blue and green). It should be noted that our DTA machine shows some small artefacts similar to the weak peaks in the 2<sup>nd</sup> heating cycle. Therefore, we do not assign any thermal effects to these signals.

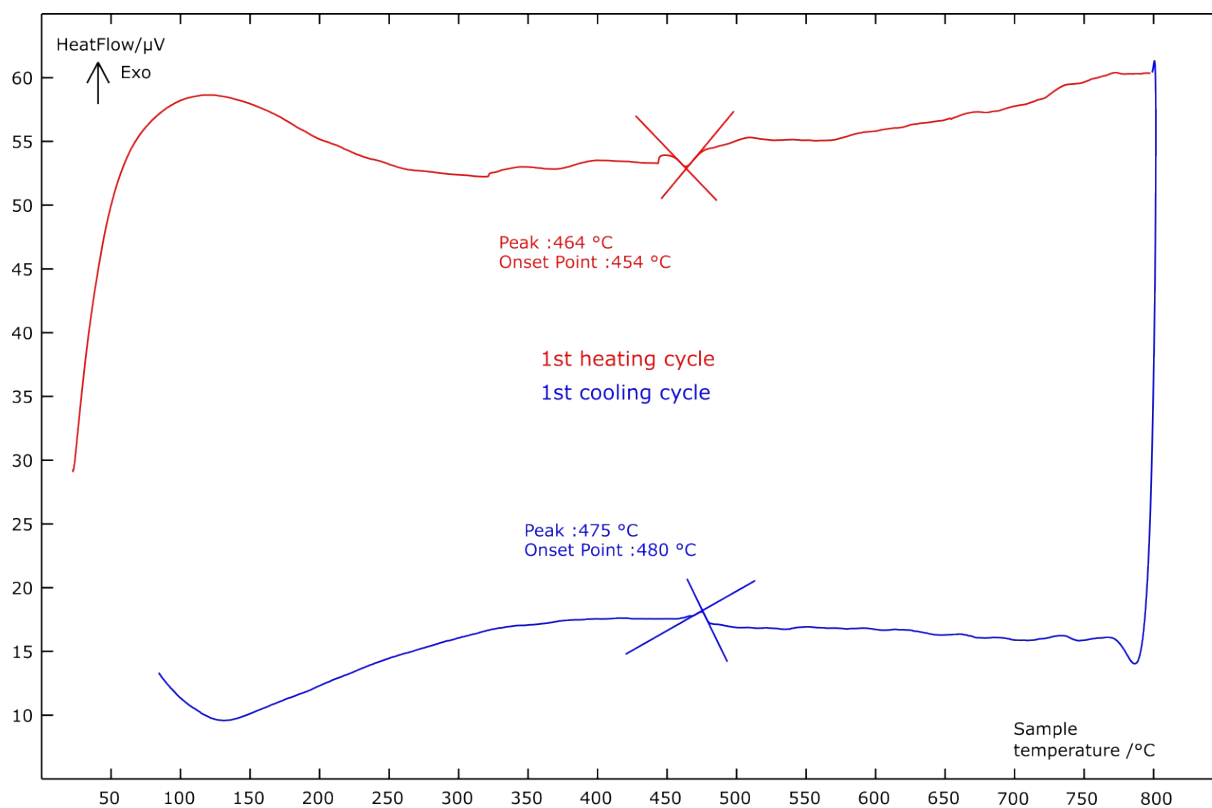

**Figure S15.** Differential thermal analysis (DTA) of  $\text{Li}_{14}\text{GeAs}_6$  showing one endothermic effect in the heating cycle (red) and one exothermic effect in the cooling cycle (blue). Because of high corrosion of the silica glass ampoule only one heating and cooling cycle was measured. It should be noted that our DTA machine shows some small artefacts similar to the weak peaks in the heating cycle. Therefore, we do not assign any thermal effects to these signals.

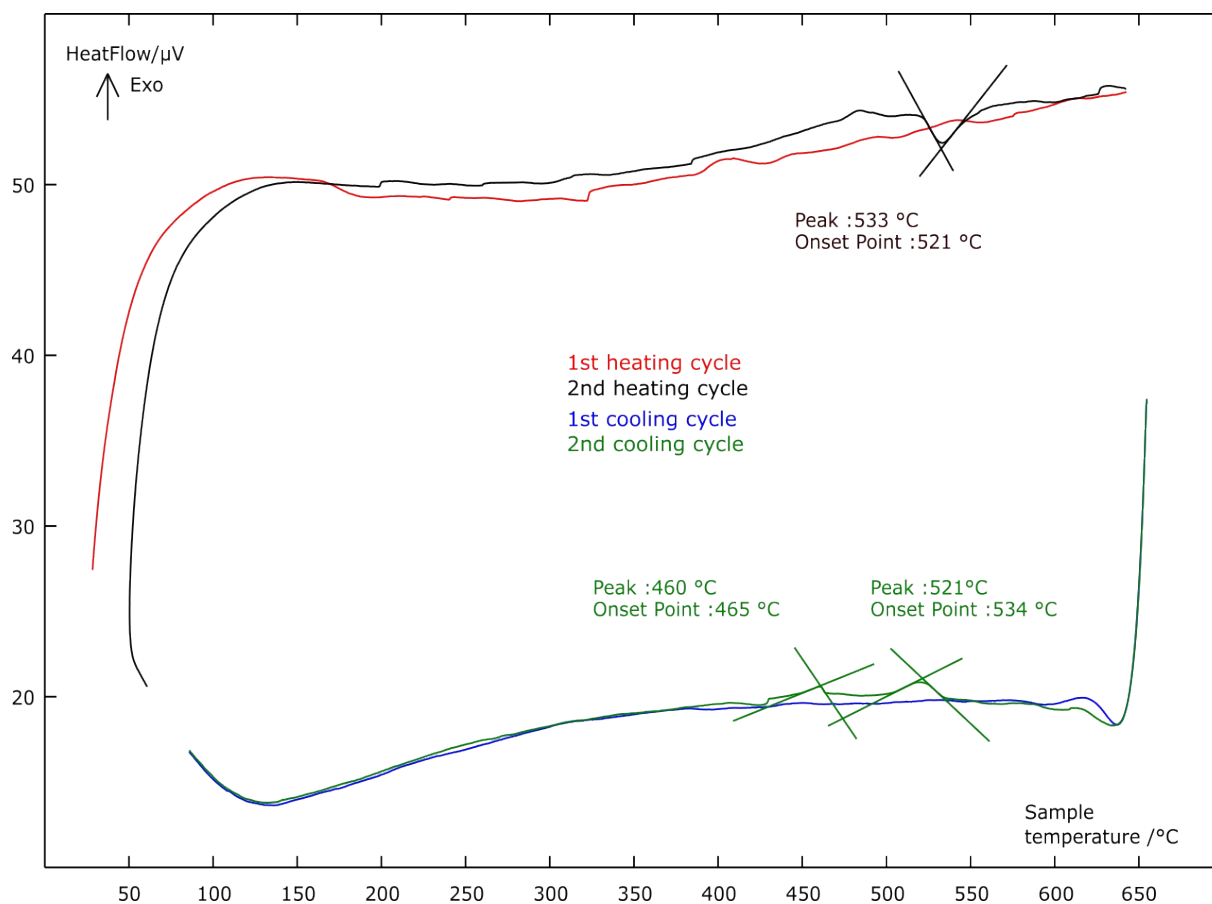

**Figure S16.** Differential thermal analysis (DTA) of  $\text{Li}_{14}\text{SnAs}_6$  showing endothermal effects in the heating cycles (red and black) and exothermal effects in the cooling cycles (blue and green). It should be noted that our DTA machine shows some small artefacts similar to the weak peaks in the 2<sup>nd</sup> heating cycle. Therefore, we do not assign any thermal effects to these signals.

## 4. Conductivity experiments

Conductivity measurements were carried out by a Zahner Zennium impedance analyser connected with an in-house designed cell. The samples were prepared by applying pressure (6 t) on the powder to form cylindrical pellets ( $\varnothing = 8$  mm) with densities of 80% ( $\text{Li}_{14}\text{SiAs}_6$ ), 80% ( $\text{Li}_{14}\text{GeAs}_6$ ), 88% ( $\text{Li}_{14}\text{SnAs}_6$ ), 83% ( $\text{Li}_8\text{SiAs}_4$ ) and 81% ( $\text{Li}_8\text{GeAs}_4$ ). The pellets were contacted using indium foil. Current was collected by platin electrodes placed between the indium foil and corundum spaces which isolates the contacts from the environment (corundum // platin contact // indium foil // sample // indium foil // platin contact // corundum). Impedance measurements were performed by two heating and two cooling cycles in a temperature range of 50 °C – 100 °C in steps of 10 °C. Samples were kept at the measuring temperature for at least 20 minutes for ensuring thermal equilibrium. The frequency of the applied excitation voltage (50 mV) was swept starting from 1 MHz to 100 mHz. For determining the lithium ion mobility only data from the last cooling cycle was used sparing out the previous heating and the first cooling cycle, because the ongoing sintering process between the sample and the indium contacts led to better data quality for the last cooling cycle. To retrieve the real resistance values from the Nyquist plots the low frequency tails were extrapolated to intersect with the x axis followed by a correction of the geometrical parameters and density of the sample pellets. The Nyquist plot of  $\text{Li}_8\text{GeAs}_4$  shows a second semicircle embedded in the low frequency tail between the first semicircle and the low frequency tail which can be possibly assigned to grain boundaries.

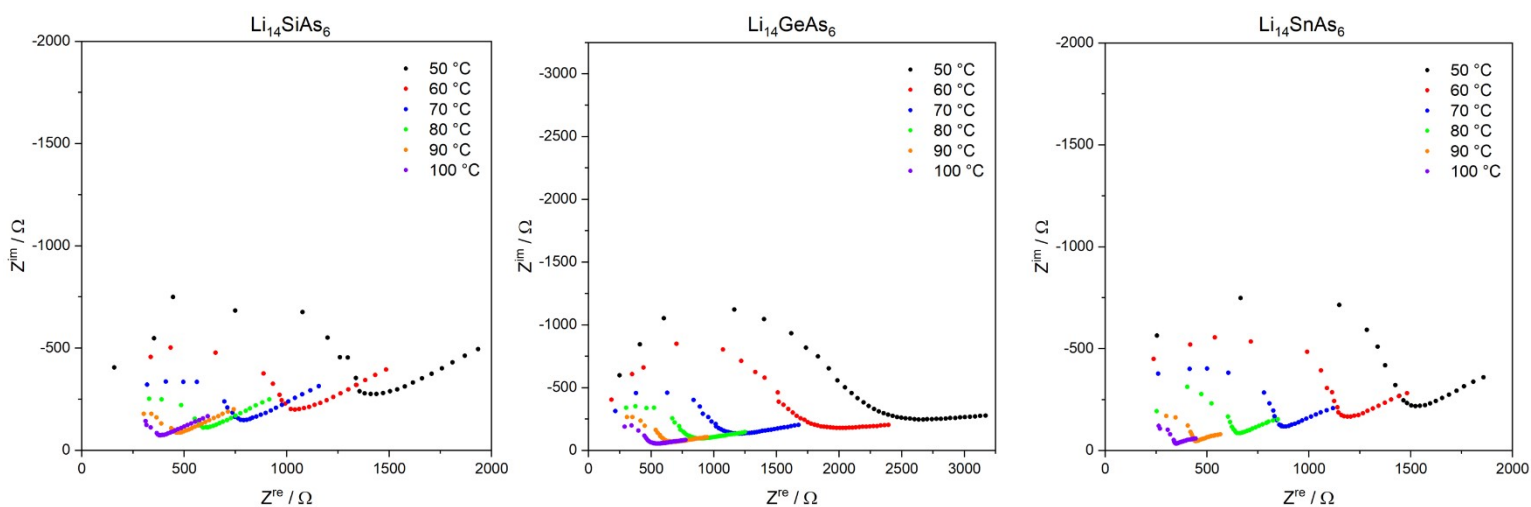

**Figure S17.** Nyquist plots of the compounds  $\text{Li}_{14}\text{SiAs}_6$ ,  $\text{Li}_{14}\text{GeAs}_6$  and  $\text{Li}_{14}\text{SnAs}_6$  (left to right) in the temperature range of 50 °C – 100 °C.

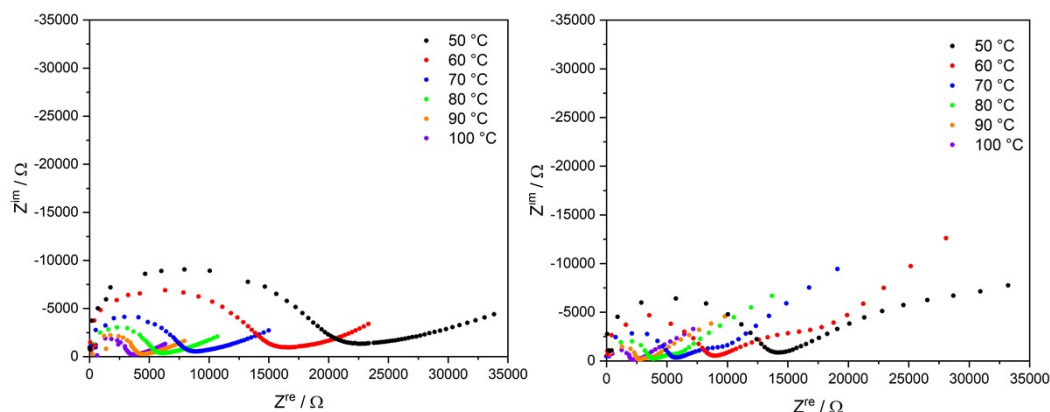

**Figure S18.** Nyquist plots of the compounds  $\text{Li}_8\text{SiAs}_4$ (left) and  $\text{Li}_8\text{GeAs}_4$ (right) in the temperature range of 50 °C – 100 °C.
